# Supplementary material for: Psychiatric adverse events associated with the COVID-19 vaccines approved in the Republic of Korea: a systematic review
Source: PubMed Central journal article supplement — Osong Public Health Res Perspect. 2024 Mar 28;15(2):107–14. doi: 10.24171/j.phrp.2023.0325 (PMC11082440; doi:10.24171/j.phrp.2023.0325), 2024-03-28
Supplement: j-phrp-2023-0325-Supplementary-Table-1.pdf [file j-phrp-2023-0325-Supplementary-Table-1.pdf]

**Supplementary Table 1.** Search strategy

[Ovid-Medline]

| no. | Search strategy                                                                                                                                                                                                                                                                                                                             |
|-----|---------------------------------------------------------------------------------------------------------------------------------------------------------------------------------------------------------------------------------------------------------------------------------------------------------------------------------------------|
| 1   | exp COVID-19/ OR exp SARS-CoV-2/                                                                                                                                                                                                                                                                                                            |
| 2   | ("COVID-19" OR COVID19 OR COVID?2019 OR "SARS-CoV-2" OR "SARS-CoV2" OR (coronavirus adj3 2019) OR (novel coronavirus adj2 2019) OR 2019nCoV OR 19nCoV OR SARS?COV?2 OR (SARS adj3 coronavirus 2) OR (novel adj3 coronavirus?19) OR "Severe acute respiratory syndrome virus 2" OR "Severe acute respiratory syndrome coronavirus 2").tw,kw. |
| 3   | 1 OR 2                                                                                                                                                                                                                                                                                                                                      |
| 4   | <b>limit 3 to yr = "2020 -Current"</b>                                                                                                                                                                                                                                                                                                      |
| 5   | (Vaccin* OR immunizat*).tw,kw.                                                                                                                                                                                                                                                                                                              |
| 6   | exp COVID-19 Vaccines/                                                                                                                                                                                                                                                                                                                      |
| 7   | 5 OR 6                                                                                                                                                                                                                                                                                                                                      |
| 8   | ((Bivalent adj5 vaccin*) OR (omicron?containing adj3 vaccin*) OR (omicron?containing adj3 booster*)).tw,kw.                                                                                                                                                                                                                                 |
| 9   | (Omicron BA* adj4 (vaccin* OR booster*)).tw,kw.                                                                                                                                                                                                                                                                                             |
| 10  | 8 OR 9                                                                                                                                                                                                                                                                                                                                      |
| 11  | <b>4 AND (7 OR 10)</b>                                                                                                                                                                                                                                                                                                                      |
| 12  | exp Anxiety Disorders/ OR exp mental fatigue/ OR ((panic adj2 (attack* OR disorder*)) OR (mental health adj2 (illness OR problem OR outcome)) OR brain fog* OR psychological symptoms).tw,kw                                                                                                                                                |
| 13  | (depression or (depressive disorder)).tw,kw                                                                                                                                                                                                                                                                                                 |
| 14  | exp Sleep Disorders/ OR (insomnia OR delirium).tw,kw                                                                                                                                                                                                                                                                                        |
| 15  | ((psychotic adj2 (disorder* OR problem)) OR (mood adj2 disorder*) OR psychosis OR (cognitive adj2 (defici* OR impairment))).tw,kw.                                                                                                                                                                                                          |
| 16  | 12 OR 13 OR 14 OR 15                                                                                                                                                                                                                                                                                                                        |
| 17  | (population?base* or national or nation* or nation?wide or self?control* or Self-controlled case series or SCCS or database* or registr* or cohort).tw,kw.                                                                                                                                                                                  |
| 18  | <b>11 AND 16 AND 17</b>                                                                                                                                                                                                                                                                                                                     |

[Embase]

| no. | Search strategy                                                                                                                                                                                                                                                                                                                                       |
|-----|-------------------------------------------------------------------------------------------------------------------------------------------------------------------------------------------------------------------------------------------------------------------------------------------------------------------------------------------------------|
| 1   | 'coronavirus disease 2019'/exp OR 'Severe acute respiratory syndrome coronavirus 2'/exp                                                                                                                                                                                                                                                               |
| 2   | ("COVID-19" OR COVID19 OR COVID?2019 OR "SARS-CoV-2" OR "SARS-CoV2" OR (coronavirus NEAR/3 2019) OR (novel coronavirus NEAR/2 2019) OR 2019nCoV OR 19nCoV OR SARS?COV?2 OR (SARS NEAR/3 coronavirus 2) OR (novel NEAR/3 coronavirus?19) OR "Severe acute respiratory syndrome virus 2" OR "Severe acute respiratory syndrome coronavirus 2"):ab,ti,kw |
| 3   | 1 OR 2                                                                                                                                                                                                                                                                                                                                                |
| 4   | <b>3 AND [2020-2023]/py</b>                                                                                                                                                                                                                                                                                                                           |
| 5   | (Vaccin* OR immunizat*):ab,ti,kw                                                                                                                                                                                                                                                                                                                      |
| 6   | 'SARS-CoV-2 vaccine'/exp                                                                                                                                                                                                                                                                                                                              |
| 7   | 5 OR 6                                                                                                                                                                                                                                                                                                                                                |
| 8   | ((Bivalent NEAR/5 vaccin*) OR (omicron?containing NEAR/3 vaccin*) OR (omicron?containing NEAR/3 booster*)):ab,ti,kw                                                                                                                                                                                                                                   |
| 9   | (Omicron BA* NEAR/4 (vaccin* OR booster*)):ab,ti,kw                                                                                                                                                                                                                                                                                                   |
| 10  | 8 OR 9                                                                                                                                                                                                                                                                                                                                                |
| 11  | <b>4 AND (7 OR 10)</b>                                                                                                                                                                                                                                                                                                                                |
| 12  | exp 'anxiety disorder'/exp OR 'mental fatigue'/exp OR ((panic NEAR/2 (attack* OR disorder*)) OR ('mental health' NEAR/2 (illness OR problem OR outcome)) OR 'brain fog*' OR 'psychological symptoms'):ab,ti,kw                                                                                                                                        |
| 13  | (depression or 'depressive disorder'):ab,ti,kw                                                                                                                                                                                                                                                                                                        |
| 14  | 'sleep disorder'/exp OR (insomnia OR delirium):ab,ti,kw                                                                                                                                                                                                                                                                                               |
| 15  | ((psychotic NEAR/2 (disorder* OR problem)) OR (mood NEAR/2 disorder*) OR psychosis OR (cognitive NEAR/2 (defici* OR impairment))):ab,ti,kw                                                                                                                                                                                                            |
| 16  | <b>12 OR 13 OR 14 OR 15</b>                                                                                                                                                                                                                                                                                                                           |
| 17  | (population?base* or national or nation* or nation?wide or self?control* or Self-controlled case series or SCCS or database* or registr* or cohort):ab,ti,kw AND ('article'/it OR 'article in press'/it OR 'review'/it OR 'short survey'/it)                                                                                                          |
| 18  | <b>11 AND 16 AND 17</b>                                                                                                                                                                                                                                                                                                                               |

## [Cochrane Library]

| no. | Search strategy                                                                                                                                                                                                                                                                                                                                       |
|-----|-------------------------------------------------------------------------------------------------------------------------------------------------------------------------------------------------------------------------------------------------------------------------------------------------------------------------------------------------------|
| 1   | [mh "COVID-19"] OR [mh "SARS-CoV-2"]                                                                                                                                                                                                                                                                                                                  |
| 2   | ("COVID-19" OR COVID19 OR COVID?2019 OR "SARS-CoV-2" OR "SARS-CoV2" OR (coronavirus NEAR/3 2019) OR (novel coronavirus NEAR/2 2019) OR 2019nCoV OR 19nCoV OR SARS?COV?2 OR (SARS NEAR/3 coronavirus 2) OR (novel NEAR/3 coronavirus?19) OR "Severe acute respiratory syndrome virus 2" OR "Severe acute respiratory syndrome coronavirus 2"):ab,ti,kw |
| 3   | #1 OR #2                                                                                                                                                                                                                                                                                                                                              |
| 4   | <b>#3 with Publication Year from 2020 to present, in Trials</b>                                                                                                                                                                                                                                                                                       |
| 5   | (Vaccin* OR immunizat*):ab,ti,kw                                                                                                                                                                                                                                                                                                                      |
| 6   | [mh "COVID-19 Vaccines"]                                                                                                                                                                                                                                                                                                                              |
| 7   | #5 OR #6                                                                                                                                                                                                                                                                                                                                              |
| 8   | ((Bivalent NEAR/5 vaccin*) OR (omicron?containing NEAR/3 vaccin*) OR (omicron?containing NEAR/3 booster*)):ab,ti,kw                                                                                                                                                                                                                                   |
| 9   | (Omicron BA* NEAR/4 (vaccin* OR booster*)):ab,ti,kw                                                                                                                                                                                                                                                                                                   |
| 10  | #8 OR #9                                                                                                                                                                                                                                                                                                                                              |
| 11  | <b>#4 AND (#7 OR #10)</b>                                                                                                                                                                                                                                                                                                                             |
| 12  | [mh "Anxiety Disorders"] OR [mh "Mental Fatigue"] OR ((panic NEAR/2 (attack* OR disorder*)) OR ('mental health' NEAR/2 (illness OR problem OR outcome)) OR 'brain fog*' OR 'psychological symptoms'):ab,ti,kw                                                                                                                                         |
| 13  | (depression OR "depressive disorder"):ab,ti,kw                                                                                                                                                                                                                                                                                                        |
| 14  | [mh "Sleep Wake Disorders"] OR (insomnia OR delirium):ab,ti,kw                                                                                                                                                                                                                                                                                        |
| 15  | ((psychotic NEAR/2 (disorder* OR problem)) OR (mood NEAR/2 disorder*) OR psychosis OR (cognitive NEAR/2 (defici* OR impairment))):ab,ti,kw                                                                                                                                                                                                            |
| 16  | <b>#12 OR #13 OR #14 OR #15</b>                                                                                                                                                                                                                                                                                                                       |
| 17  | (population?base* OR national OR nation* OR nation?wide OR self?control* OR Self-controlled case series OR SCCS OR database* OR registr* OR cohort):ab,ti,kw                                                                                                                                                                                          |
| 18  | <b>#11 AND #16 AND #17</b>                                                                                                                                                                                                                                                                                                                            |

## [KoreaMed]

| no. | Search strategy                                                                                                                                                                                  |
|-----|--------------------------------------------------------------------------------------------------------------------------------------------------------------------------------------------------|
| 1   | ("COVID-19"[MH] OR "COVID-19"[ALL] OR "SARS-CoV-2"[MH] OR "SARS-CoV2"[ALL])                                                                                                                      |
| 2   | ("Anxiety"[MH]) OR ("Anxiety Disorders"[MH]) OR ("mental fatigue"[MH]) OR ("brain fog"[ALL]) OR ("Sleep Disorders"[MH]) OR ("insomnia"[ALL]) OR ("delirium"[ALL]) OR ("psychotic disorder"[ALL]) |
| 3   | <b>1 AND 2</b>                                                                                                                                                                                   |
